# Supplementary material for: High filamin-C expression predicts enhanced invasiveness and poor outcome in glioblastoma multiforme
Source: PubMed Central journal article supplement (PMC6474268; doi:10.1038/s41416-019-0413-x), 2019-03-14

A

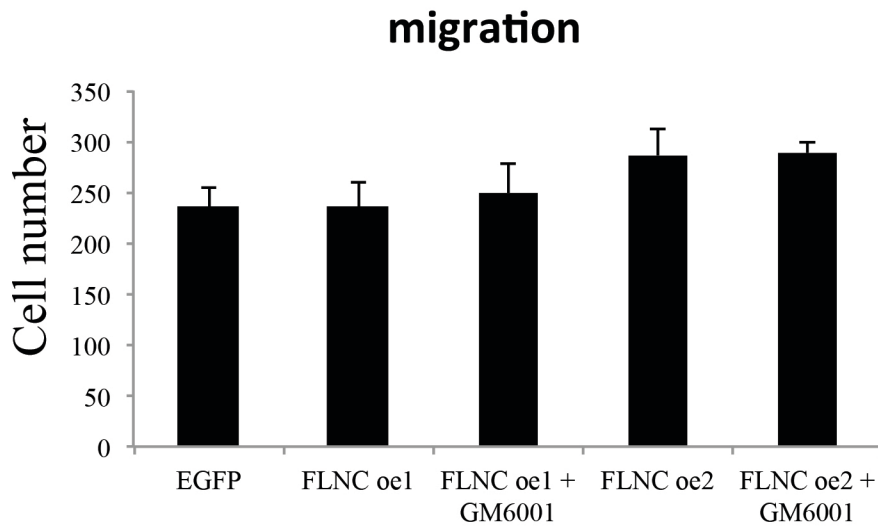

B

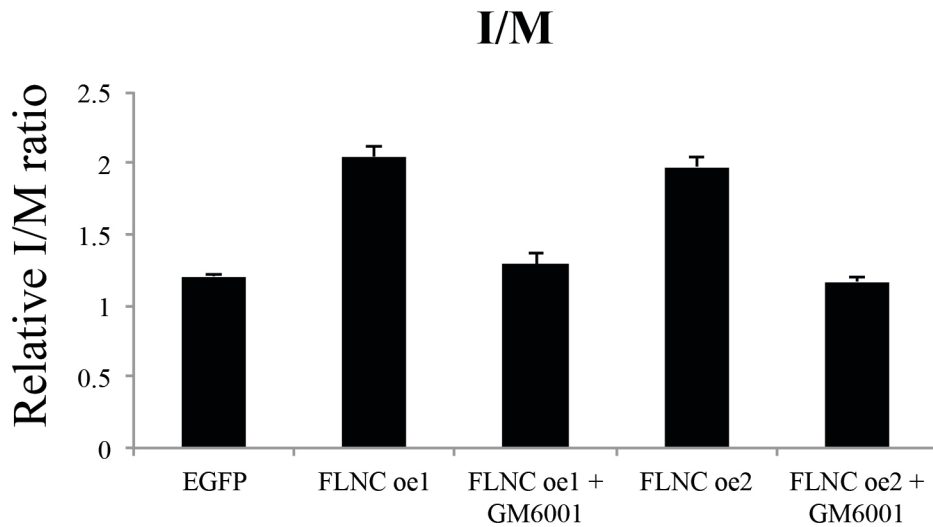

Supplement: 41416_2019_413_MOESM8_ESM.pdf [file 41416_2019_413_MOESM8_ESM.pdf]
